# Supplementary material for: Growth of a sea urchin-like rutile TiO2 hierarchical microsphere film on Ti foil for a quasi-solid-state dye-sensitized solar cell
Source: Royal Society of Chemistry journal article supplement (doi:10.1039/c7nr06360a), 2017-01-01
Supplement: c7nr06360a1.pdf [file c7nr06360a1.pdf]

## Electronic supplementary information

### Growth of sea urchin-like rutile TiO<sub>2</sub> hierarchical microspheres film on Ti foil for quasi-solid-state dye-sensitized solar cell†

Jin Hyok Ri, Shufang Wu, Jingpeng Jin and Tianyou Peng\*

College of Chemistry and Molecular Sciences, Wuhan University, Wuhan 430072, P. R. China

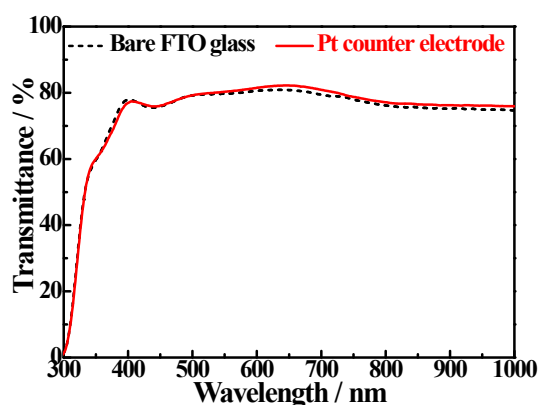

**Fig. S1** Comparison of transmittance of the resultant transparent Pt counter electrode on FTO glass and the bare FTO glass.

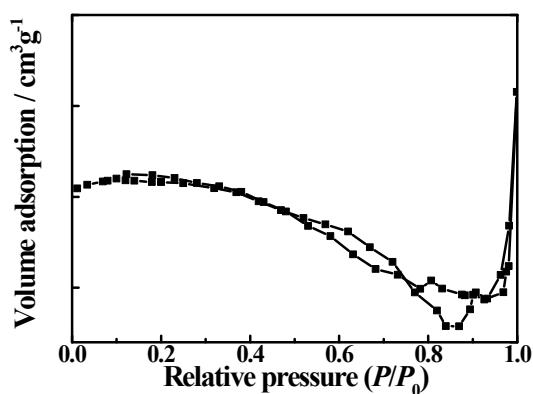

**Fig. S2** Liquid N<sub>2</sub> adsorption-desorption isotherm of the product scraped from the Ti foil-based RMS film.

\*Corresponding author. E-mail: [typeng@whu.edu.cn](mailto:typeng@whu.edu.cn) (T. Y. Peng).
